# Supplementary material
Source: HighWire-hosted journal article supplement (https://svn.bmj.com/content/7/4/285)

**Supplementary Figure 7 Outcome of the modified Rankin Scale at 90-day between different occlusion sites in PCO group.**

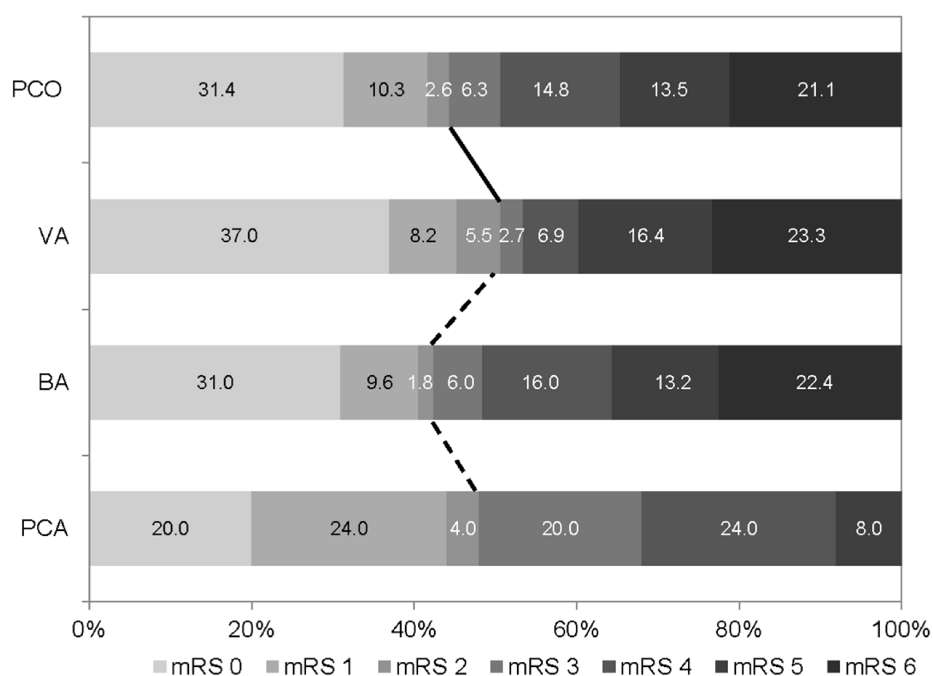

Supplement: inline-supplementary-material-4 [file inline-supplementary-material-4.pdf]
